# Supplementary material for: Enhanced efficiency of dye-sensitized solar cells via controlled thickness of the WO3 Langmuir–Blodgett blocking layer in the Debye length regime
Source: Royal Society of Chemistry journal article supplement (doi:10.1039/d4ma00063c), 2024-01-01
Supplement: d4ma00063c1.pdf [file d4ma00063c1.pdf]

## Supporting Information:

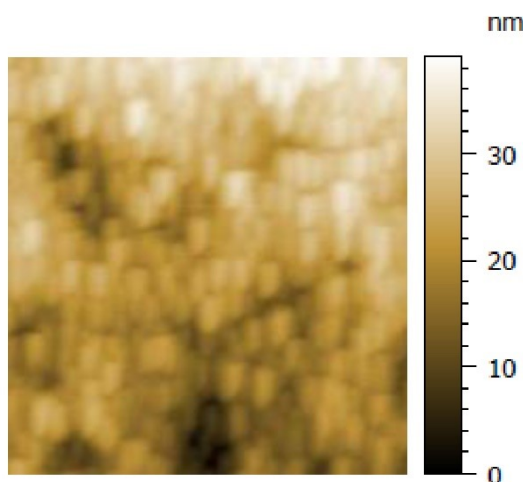

**FIGURE S1.** AFM images of thermally decomposed  $\text{WO}_3$  film, the area shown is  $1.5 \times 1.5 \mu\text{m}$  array.

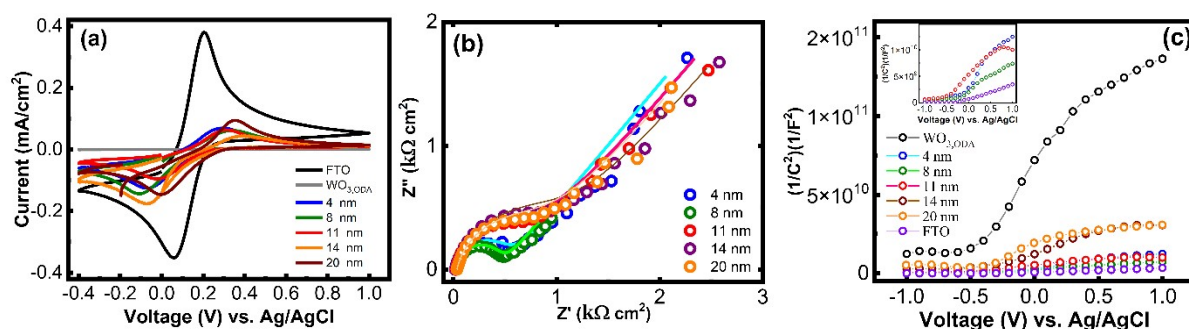

**FIGURE S2.** (a) cyclic voltammogram, (b) EIS spectra and (c) Mott-Schottky plots of the  $\text{WO}_3$  blocking layer as a function of thickness

The cyclic voltammograms of  $\text{WO}_3$  coated FTO reveals decrease in the anodic current, which is accompanied by simultaneous increase in the peak-to-peak separation,  $\Delta E$ . No significant increase in the  $\Delta E$  value with increase in the BL thickness rules out electron tunneling (Figure S2a). Further, appearance of two-slopes in Mott-Schottky plots are characteristics of FTO covered with compact film of  $\text{WO}_3$  (Figure S2c). The larger slope can be attributed to FTO while smaller slope to the  $\text{WO}_3$  film. A significant change in the slope corresponding to  $\text{WO}_3$  film curve occurs when thickness of the film increases beyond 11 nm.

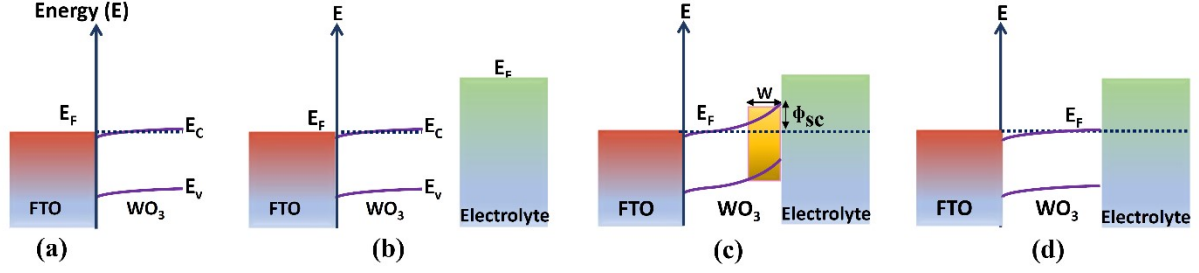

**FIGURE S3.** Energy level diagram of (a) FTO/WO<sub>3</sub> ohmic contact, (b) FTO/WO<sub>3</sub>-electrolyte, before contact and FTO/WO<sub>3</sub>-electrolyte interface, after contact for WO<sub>3</sub> thickness (c)  $\geq L_D$  and, (d)  $< L_D$ , respectively.

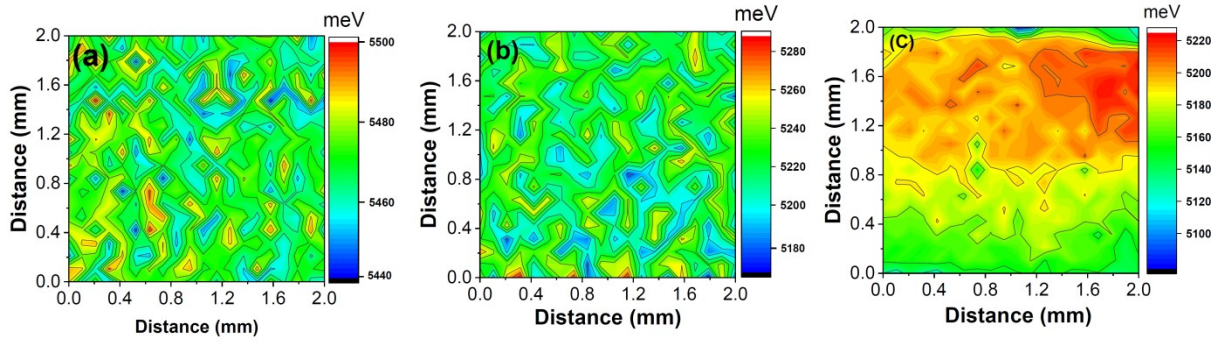

**FIGURE S4.** Contour Kelvin probe work function plots of (a) FTO, (b) spin cast WO<sub>3</sub> and LB WO<sub>3</sub>.

The estimated average work function ( $\Phi$ ) value of LB WO<sub>3</sub> was 5.195 eV, which is close to that of FTO (5.1 eV), suggesting Fermi level alignment of BL with FTO substrate. Owing to the small difference  $\Phi_{\text{WO}_3} - \Phi_{\text{FTO}}$ , the formation of ohmic-like contact (Figure S1a) is favoured between FTO and WO<sub>3</sub> BL. In the absence of built-in potential at FTO/BL interface, band bending is negligible and therefore, tunneling will not have significant contribution to charge carrier transport. This is also corroborated by the fact that short circuit current ( $J_{\text{SC}}$ ) does not increase upon reducing the thickness of the WO<sub>3</sub> layer to 4nm, thereby ruling out the contribution of the tunnelling event to the  $J_{\text{SC}}$ . The contour plots for WO<sub>3</sub> LB film in scanning area of 2 mm x2 mm exhibit  $< 0.05\%$  variation in the work function from the average value, suggesting excellent homogeneity. The homogeneity in LB WO<sub>3</sub> is much better than that of the spin cast film, which shows  $> 1.5\%$  variation in the work function from the average value (5.2 eV). Further, the  $\Phi$  of the both WO<sub>3</sub> LB and spin cast films are similar to that of TiO<sub>2</sub> (5.2 eV), which suggests that WO<sub>3</sub> films are suitable for replacing TiO<sub>2</sub> in DSCs.

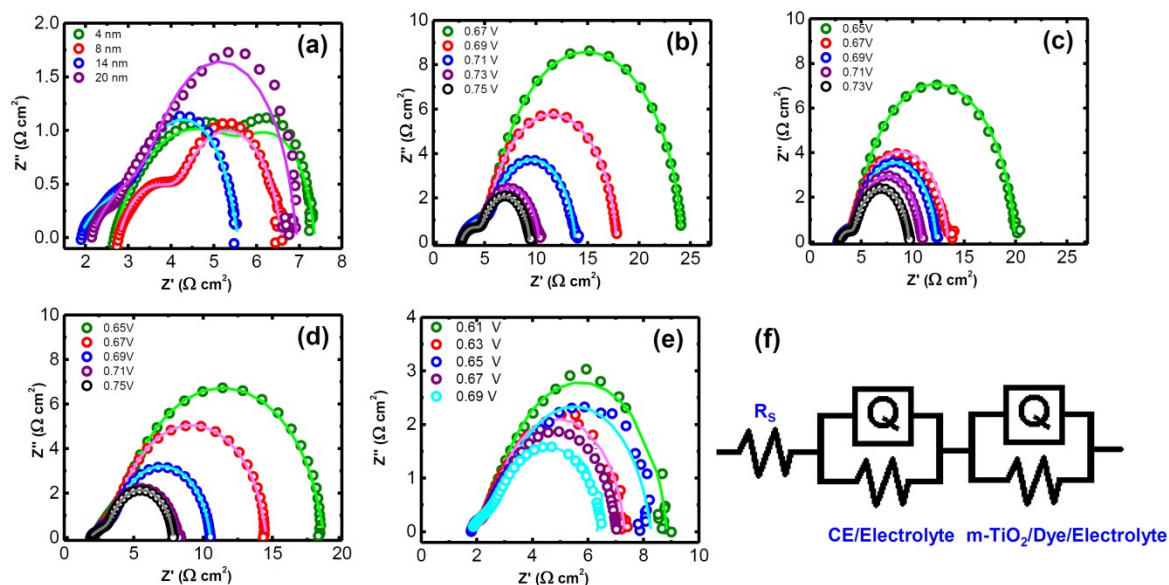

**FIGURE S5.** EIS spectra of DSCs under (a) AM 1.5 sun illumination as a function of number of layers and (b-e) dark at  $V_{OC}$ ,  $V_{OC} \pm 0.02V$  and  $V_{OC} \pm 0.04V$ . The solid lines in figure represent fitted data using a model shown in (f), two parallel circuits represent charge transfer behavior at the CE/electrolyte interface and m-TiO<sub>2</sub>/dye/electrolyte interface and series resistance ( $R_s$ ) includes BL, FTO and contact resistance.

The EIS in presented in Fig. S5, were measured at  $V_{OC}$ ,  $V_{OC} \pm 0.02V$  and  $V_{OC} \pm 0.04V$  in dark. At these potentials the photoanode is sufficiently conductive and therefore,  $C_{m-TiO_2} \gg C_{TCO}$ , where  $C_{m-TiO_2}$  and  $C_{TCO}$  are the capacitances of m-TiO<sub>2</sub> and exposed FTO substrate respectively. The estimated chemical capacitance in dark, which is the sum of  $C_{m-TiO_2}$  and  $C_{TCO}$ , therefore reduces to  $C_{m-TiO_2}$  only.

#### References:

S1: R. van de Kroll, A. Goossens<sup>1</sup> and J. Schoonman<sup>1</sup> Mott-Schottky Analysis of Nanometer-Scale Thin-Film Anatase TiO<sub>2</sub>, Journal of The Electrochemical Society, 144 (5), 1723, 1997.
